# Supplementary material for: Do adsorbed drugs onto P-glycoprotein influence its efflux capability?
Source: Royal Society of Chemistry journal article supplement (doi:10.1039/c5cp03216d), 2015-01-01
Supplement: c5cp03216d1.pdf [file c5cp03216d1.pdf]

## SUPPORTING INFORMATION

### DO DRUGS ADSORBED TO P-GLYCOPROTEIN INFLUENCE ITS EFFLUX CAPABILITY?

Ricardo J. Ferreira<sup>a</sup>, Maria-José U. Ferreira<sup>a</sup> and Daniel J.V.A. dos Santos<sup>b\*</sup>

<sup>a</sup> Research Institute for Medicines (iMed.Ulisboa), Faculdade de Farmácia, Universidade de Lisboa, Av.Prof. Gama Pinto, Lisboa, Portugal; <sup>b</sup> REQUIMTE, Department of Chemistry and Biochemistry, Faculty of Sciences, University of Porto, Rua do Campo Alegre, Porto, Portugal.

\* To whom correspondence should be addressed. Tel: +351 217946477; Fax: +351 217946470; E-mail: dsantos@ff.ul.pt; Faculdade de Farmácia da Universidade de Lisboa.

**Table S1.** Distribution of molecules between the two interfaces (and bulk water) for all considered classes (mean values  $\pm$  standart deviation).

**Figure S1.** Root mean square deviation (RMSD) for the protein (after 150 ns).

**Figure S2.** Free energies of adsorption ( $\text{kJ}\cdot\text{mol}^{-1}$ ) to the protein and lipid bilayer for each molecule.

**Figure S3.** MM/PBSA interaction energies for each molecule.

**Figures S4-S6.** Hydrogen bonding results for each molecule.

**Figures S7-S18.** Membrane-deformation profiles  $u(x,y)$  for P-glycoprotein in the presence of each molecule.

**Figures S19-S30.** Variation of the residual exposure energy penalty ( $\Delta\Delta G_{res}$ ) for each molecule, compared with the *apo* system.

**Figures S31-S33.** Area per lipid as a function of time for the *apo* system and several molecules.

**Table S1.** Distribution of molecules between the two interfaces (and bulk water) for all considered classes (mean values  $\pm$  standart deviation).

| Molecule              | Protein-Water Interface | Lipid-Water Interface | Not adsorbed (bulk water) |
|-----------------------|-------------------------|-----------------------|---------------------------|
| <i>ATP</i>            | 5 $\pm$ 2               | 4 $\pm$ 2             | 1                         |
| <i>Non-substrates</i> | 3 $\pm$ 2               | 6 $\pm$ 1             | 7 $\pm$ 1                 |
| <i>Substrates</i>     | 7 $\pm$ 2               | 5 $\pm$ 1             | 3 $\pm$ 2                 |
| <i>Modulators</i>     | 6 $\pm$ 1               | 4 $\pm$ 1             | 4 $\pm$ 1                 |

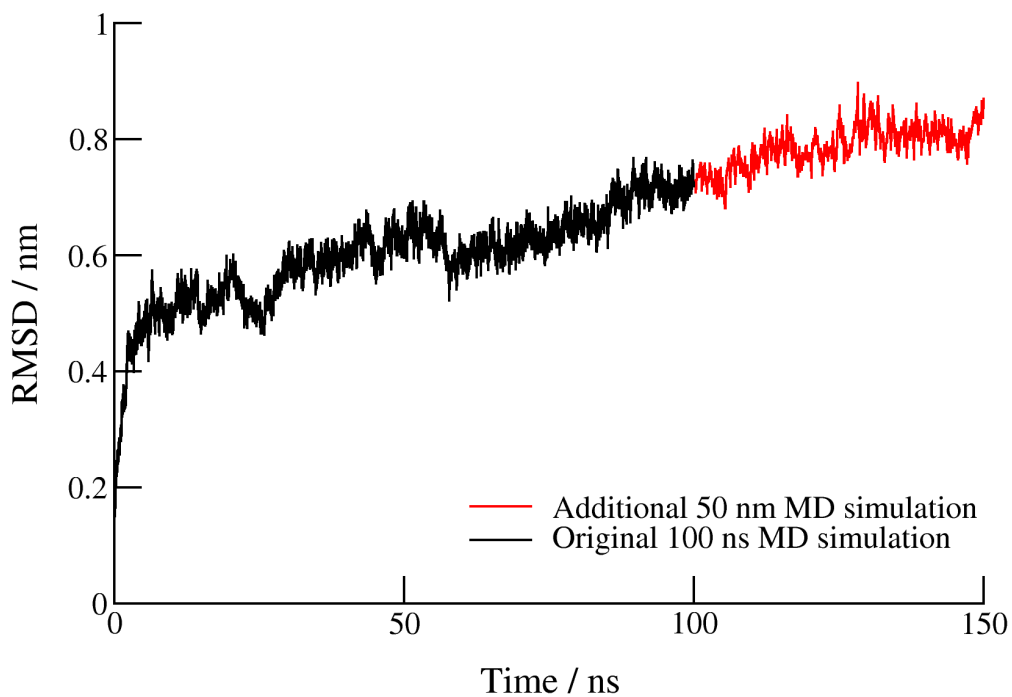

**Figure S1.** Root mean square deviation (RMSD) for the protein (after 150 ns). See also Chart 4 in Ref. 25 and discussion that follows.

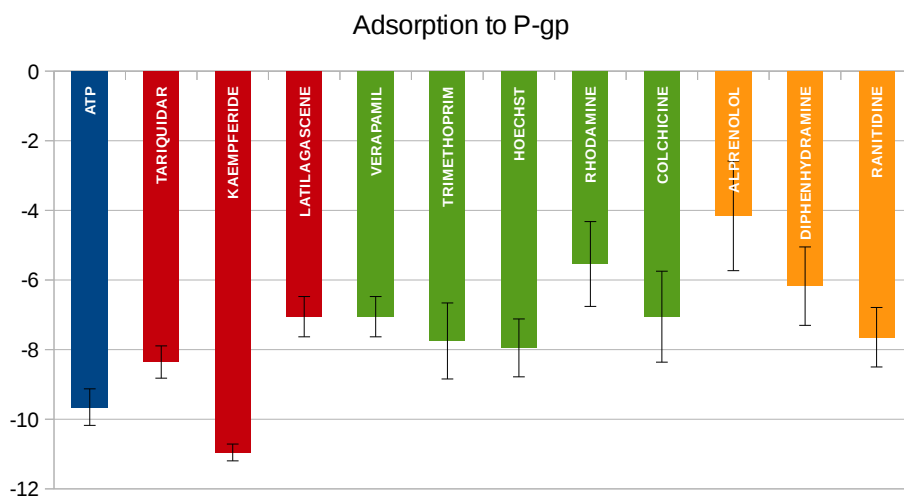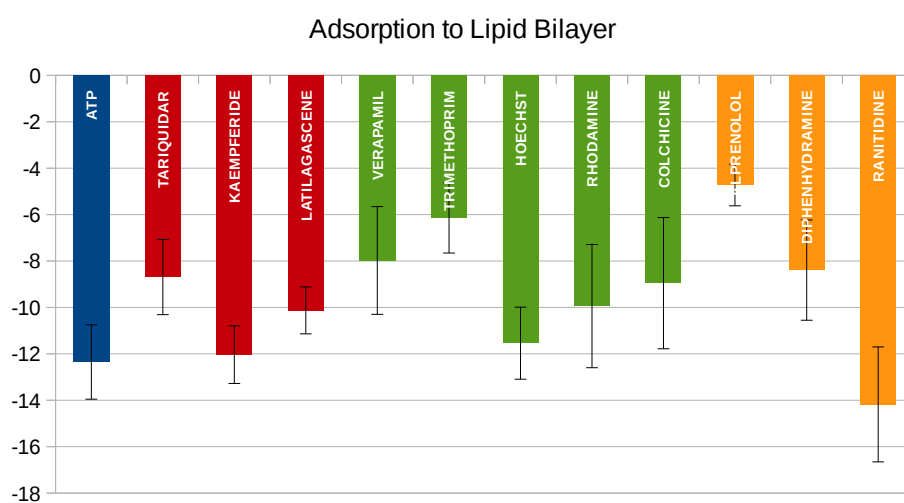

**Figure S2.** Calculated free energies of adsorption ( $\Delta G_{ads}$ , kJ.mol<sup>-1</sup>) to the protein-water (top) and lipid-water (bottom) interfaces.

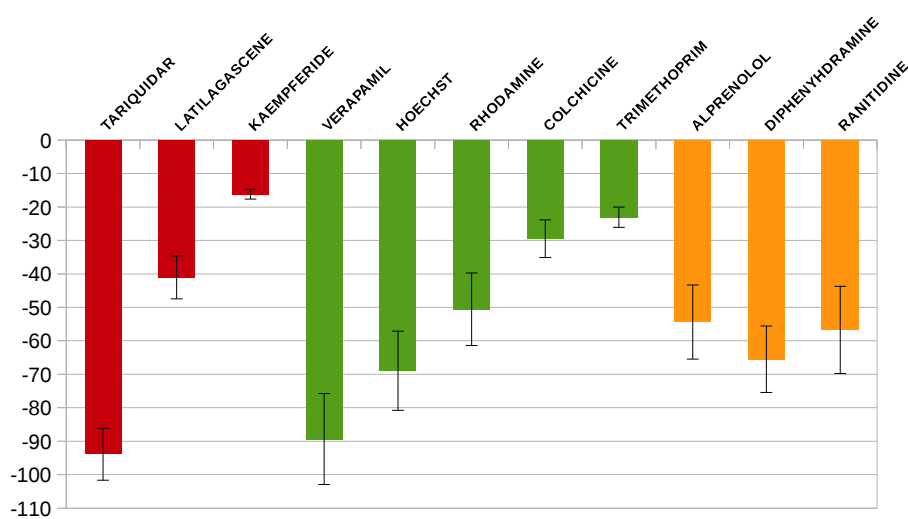

**Figure S3.** MM/PBSA relative interaction free energies (kJ.mol<sup>-1</sup>) for each molecule (as calculated with *g\_mmpbsa* with the implicit membrane correction for polar solvation energies).

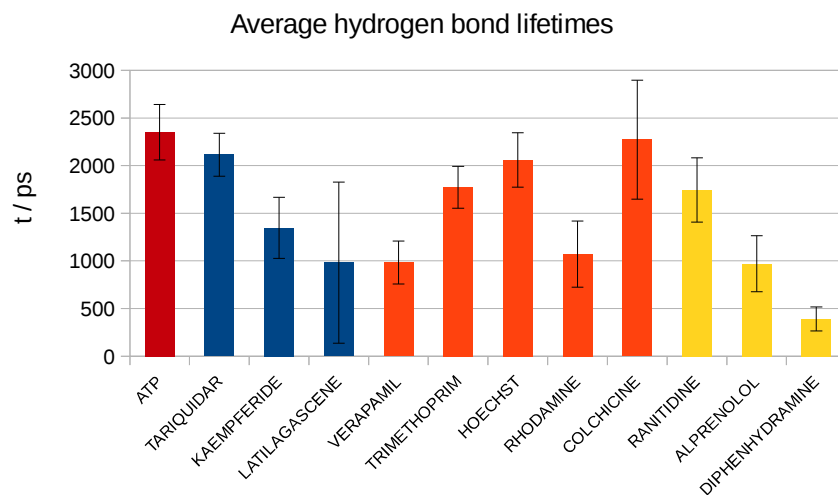

**Figure S4.** Average hydrogen bond lifetimes (mean  $\pm$  SE) for each molecule.

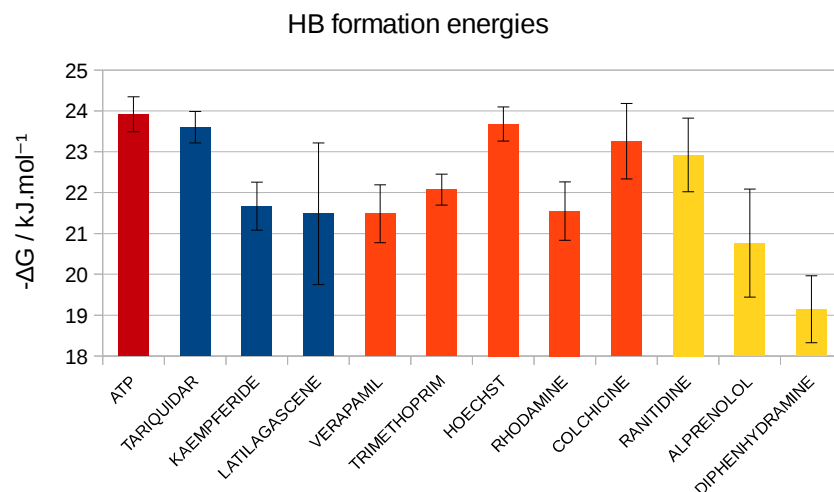

**Figure S5.** Hydrogen bond formation energies (mean  $\pm$  SE) for each molecule.

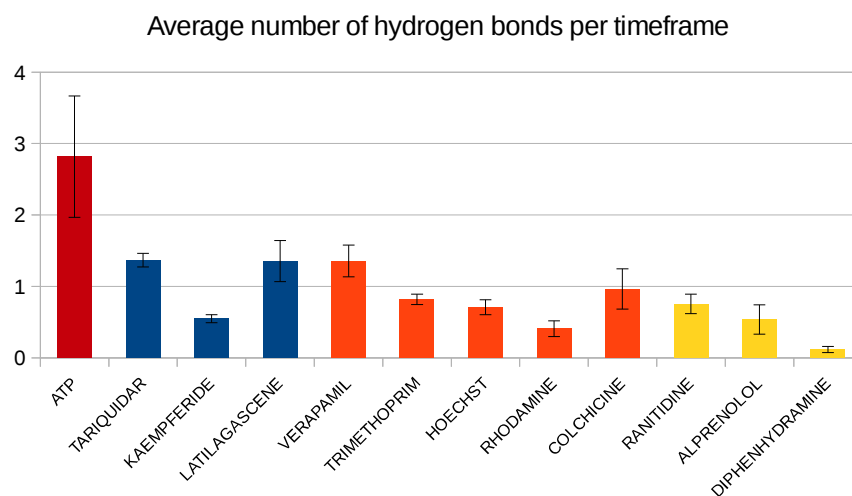

**Figure S6.** Average number of hydrogen bonds per timeframe (mean  $\pm$  SE) for each molecule.

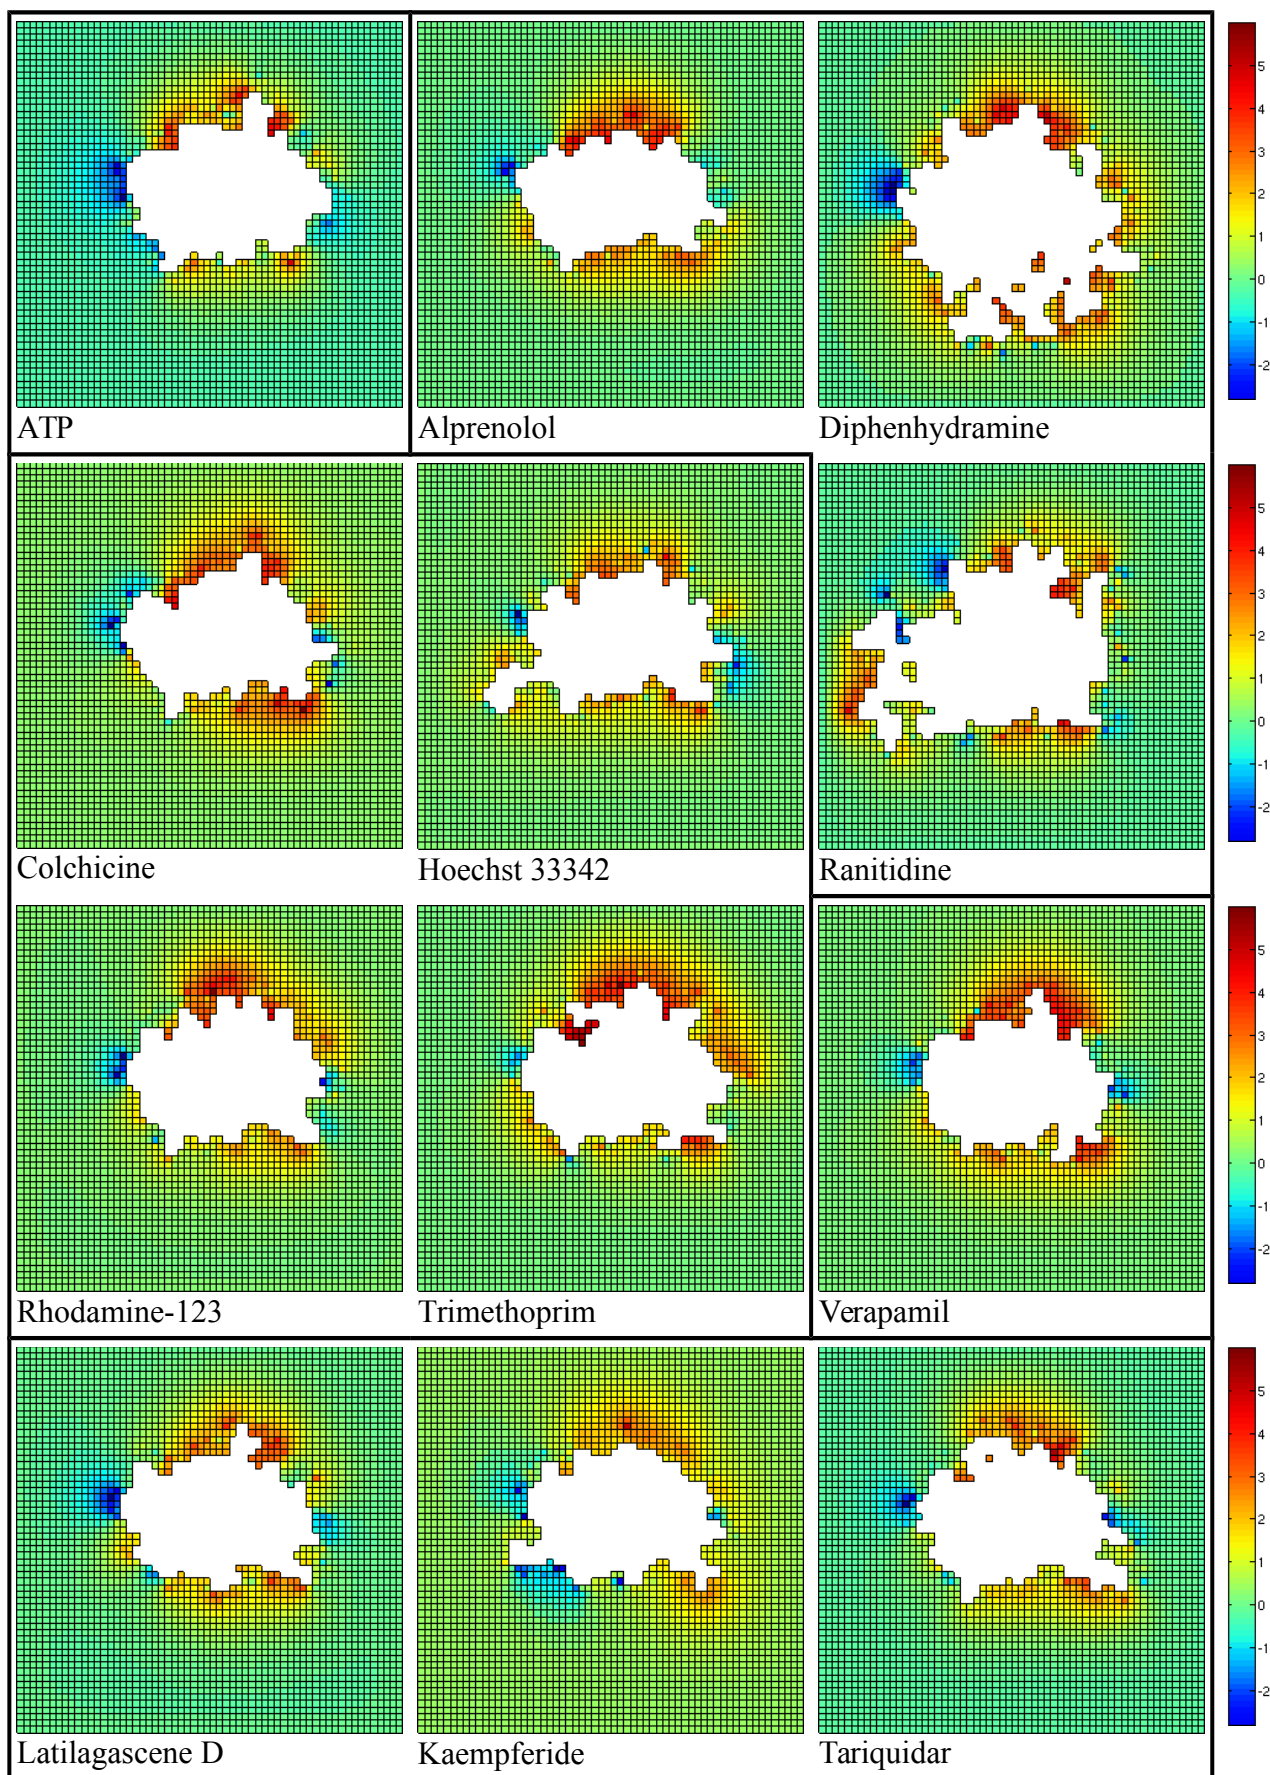

**Figures S7-S18.** Membrane-deformation profiles  $u(x,y)$  for P-glycoprotein in the presence of each molecule (units in  $k_B T$ ).

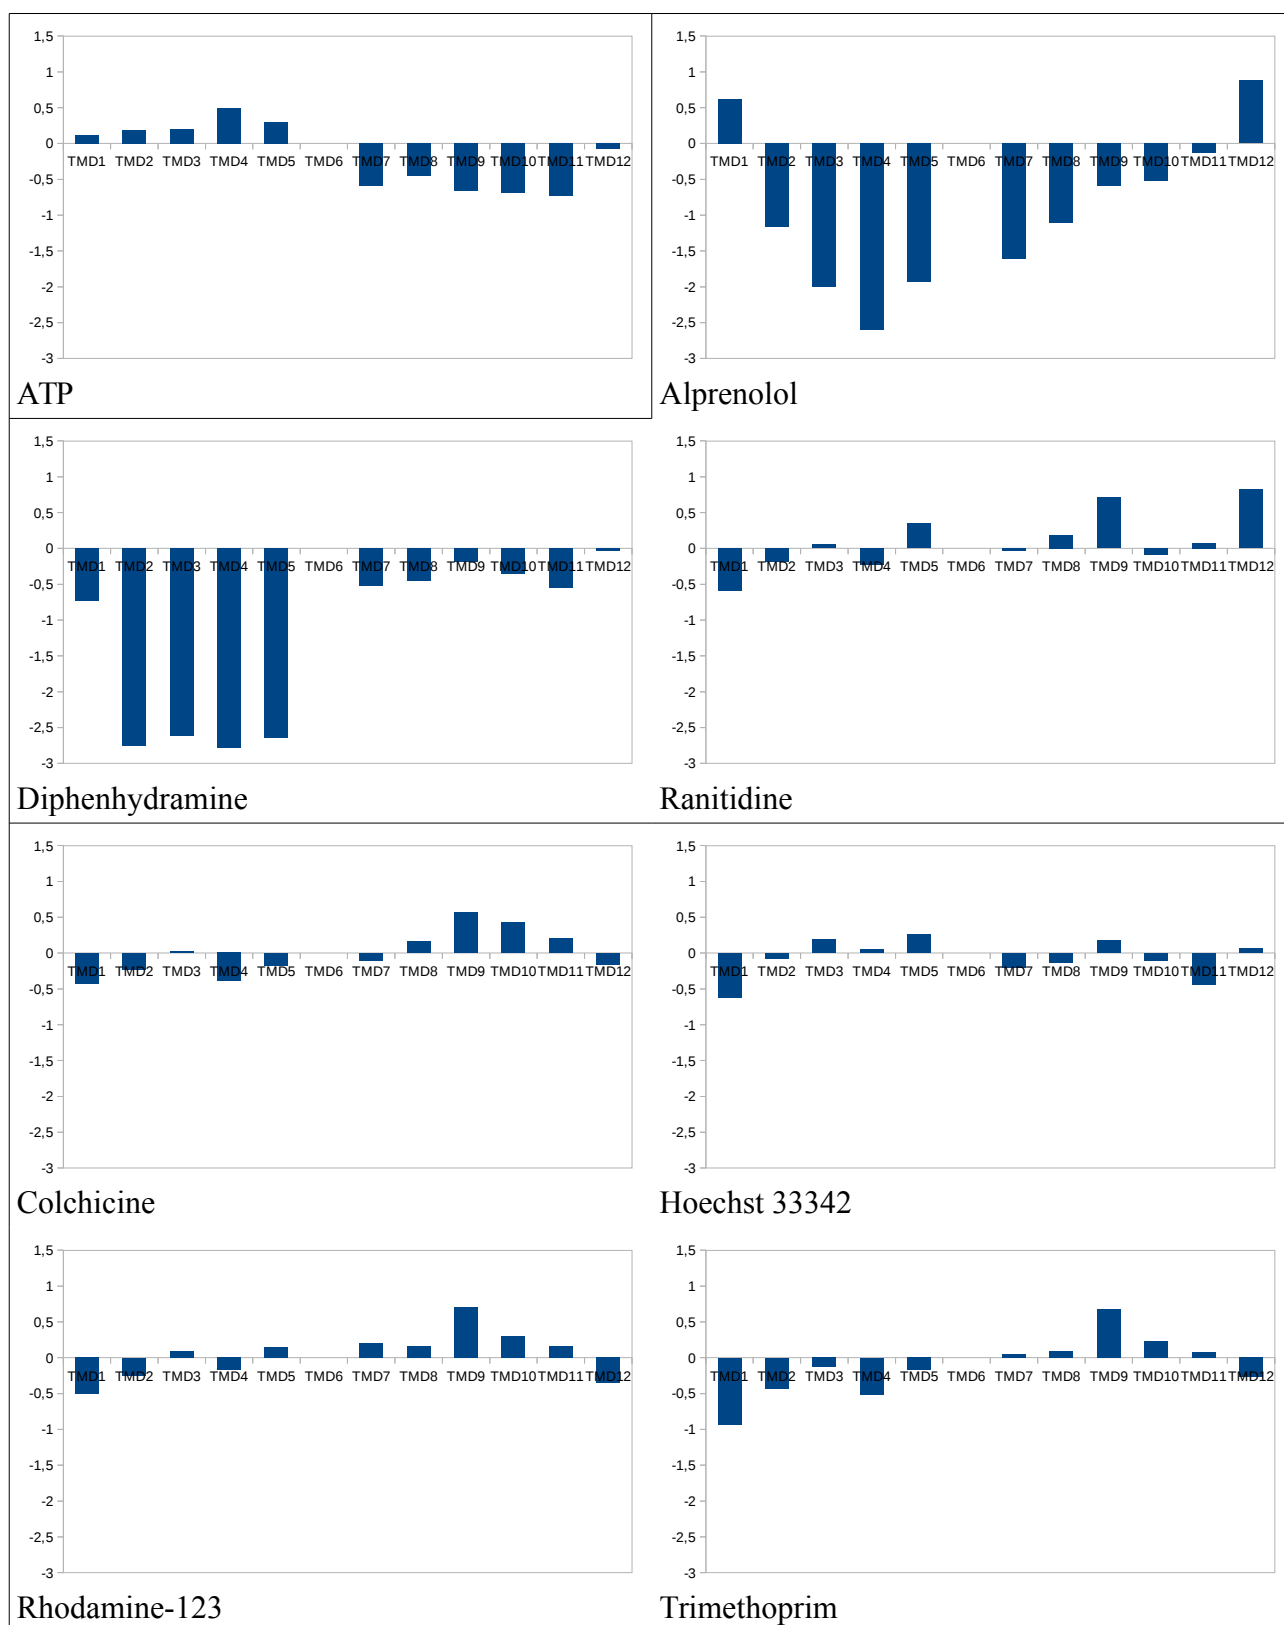

**Figures S19-26.** Variation of the residual exposure energy penalty ( $\Delta\Delta G_{res}$ ,  $\text{kJ}\cdot\text{mol}^{-1}$ ) for each molecule, compared with the *apo* system.

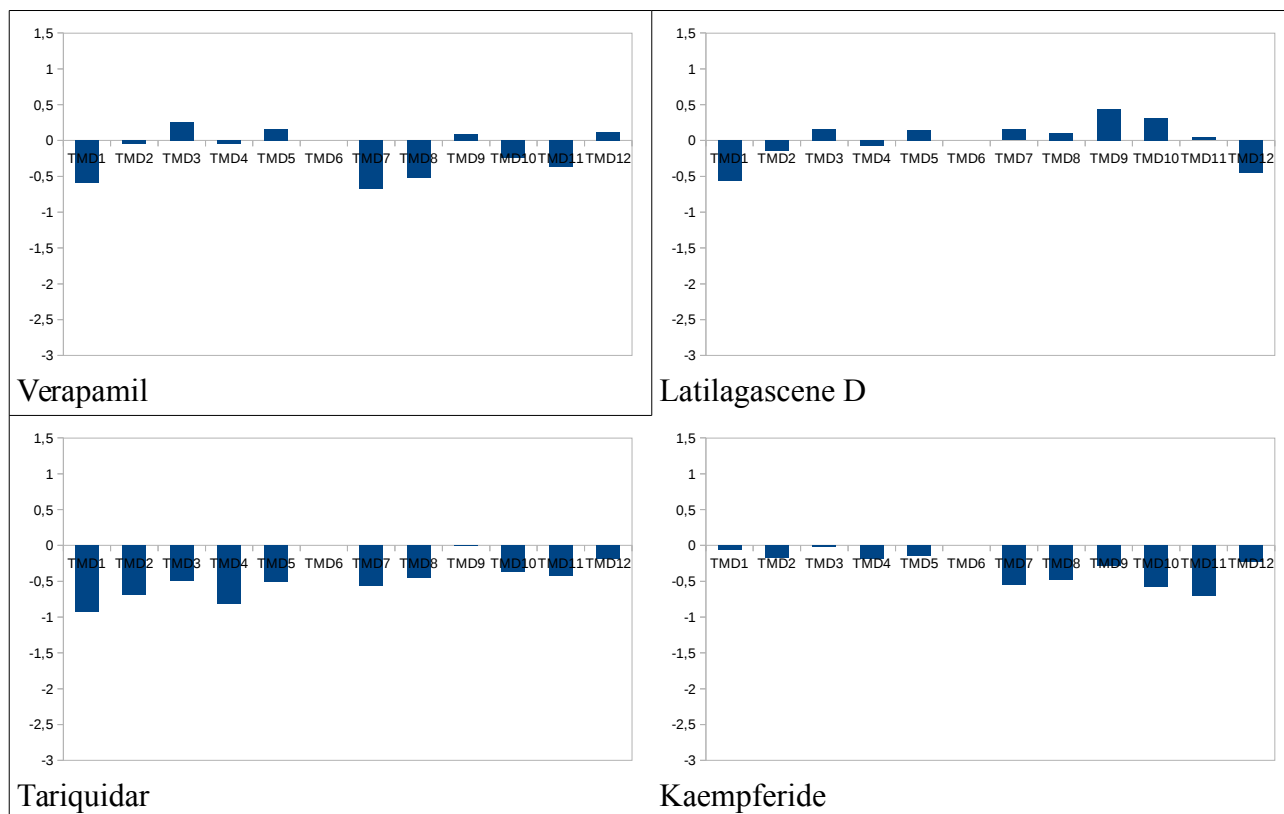

**Figures S27-30.** Variation of the residual exposure energy penalty ( $\Delta\Delta G_{res}$ ,  $\text{kJ}\cdot\text{mol}^{-1}$ ) for each molecule, compared with the *apo* system.

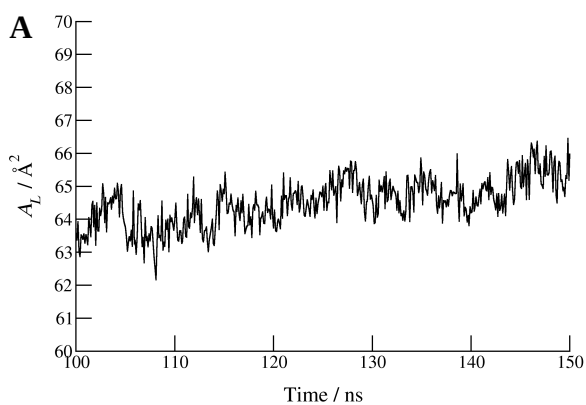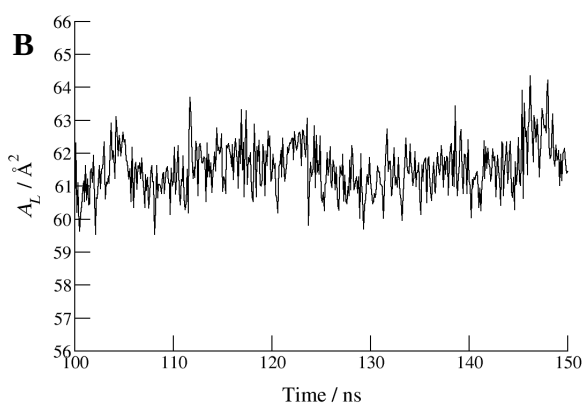

**Figure S31.** Area per lipid ( $A_L$ ) as a function of time for the *apo* system. (A), upper leaflet; (B), lower leaflet.

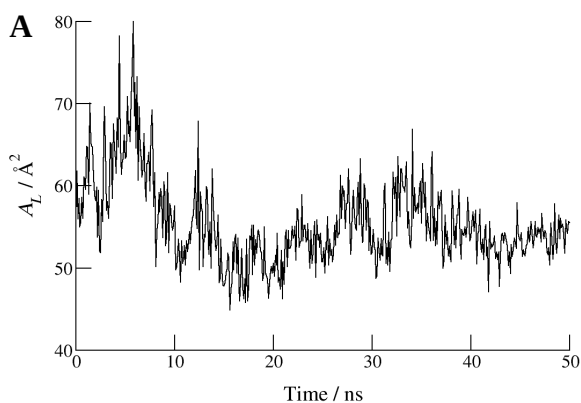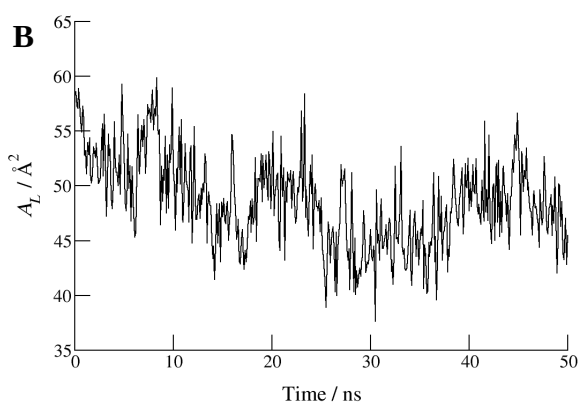

**Figure S32.** Area per lipid ( $A_L$ ) of the lower leaflet as a function of time for *substrates* Hoechst 33342 (A) and Rhodamine-123 (B).

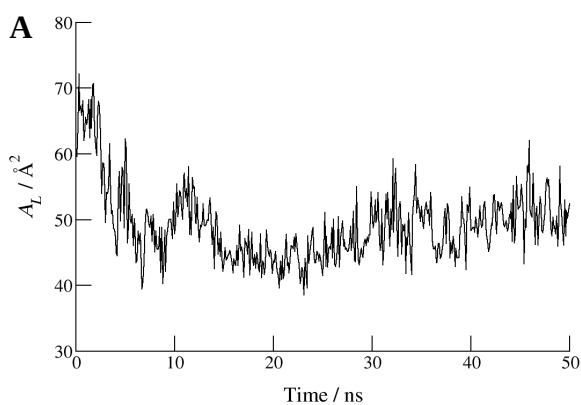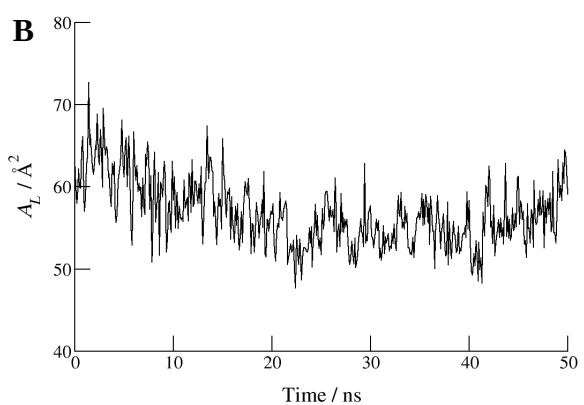

**Figure S33.** Area per lipid ( $A_L$ ) of the lower leaflet as a function of time for *modulators* tariquidar (A) and kaempferide (B).
